# Supplementary material for: Valorisation of Corncob Residue towards the Sustainable Production of Glucuronic Acid
Source: MDPI journal article supplement (doi:10.3390/catal12121603), 2022-12-07
Supplement: s1 [file s1]

Archive with 1 entries (1 files):
- catalysts-2026131-supplementary.pdf
