# Supplementary material for: Valorisation of Corncob Residue towards the Sustainable Production of Glucuronic Acid
Source: MDPI journal article supplement (doi:10.3390/catal12121603), 2022-12-07
Supplement: s1 [file s1 › catalysts-2026131-supplementary.pdf]

# Valorisation of Corncob Residue towards the Sustainable Production of Glucuronic Acid

Wei Li <sup>1,\*</sup>, Shuguang Xu <sup>2</sup> and Xiang Xu <sup>1,\*</sup>

<sup>1</sup> China National Chemical Engineering Third Construction Co., Ltd., Hefei 230601, China

<sup>2</sup> Department of Civil and Environmental Engineering, The Hong Kong Polytechnic University, Hung Hom, Kowloon, Hong Kong, China

\* Correspondence: liwei2jinyang@126.com (W.L.); xxiang1970@163.com (X.X.)

## Materials.

Maleic acid (98%) was obtained from Adamas-beta (Shanghai, China). Corncob residue powder (60–100 meshes; 17.2 wt% of lignin, 62.4 wt% of cellulose, 0.1 wt% of hemicellulose, 4.5 wt% of ash and 15.8 wt% of others unknown) was provided by Shandong Futaste Investment Co., Ltd. (Shandong Province, China); Corncob residue powder was dried in an oven at 373 K before use. Glucose (99%), Glucuronic acid (98%) and CeO<sub>2</sub> (99%), was purchased from J&K Chemicals (Beijing, China). H<sub>2</sub>AuCl<sub>4</sub>·4H<sub>2</sub>O was obtained from Chengdu Chemical Reagent Factory (Chengdu, China). The ultrapure water of 18.25 MΩ·cm<sup>-1</sup> (298K) was used after degasification. Other general reagents used in this work were purchased from J&K Chemicals (Beijing, China).

## Product analysis.

The liquid products were quantified by high performance liquid chromatography (HPLC) using a Shimadzu HPLC system equipped with a UV-vis detector and a refractive index detector and an HPX-87H Aminex Column (300 mm × 7.8 mm, Bio-Rad), which is tested to be a suitable column to successfully analyze gluconic acid, glucuronic acid and other organic acids (Figure S4). The eluent was dilute H<sub>2</sub>SO<sub>4</sub> aqueous solution (5 mM) with a flow rate of 0.60 mL·min<sup>-1</sup>. The column temperature was maintained at 323 K. The concentrations of all components were determined by comparison to the standard calibration curves.

The conversion (Con.%) of corncob residue was calculated by the following equation:

$$\text{Con. \%} = (w_i - w_r) / (w_i) \times 100$$

The yield of GA and other products were calculated as the following equation:

$$\text{Yield (\%)} = (\text{mass of product}) / (\text{mass of initial cellulose}) \times 100$$

Wherein,  $w_i$  and  $w_r$  represent the initial mass and reminded mass of corncob residue.

## Quantum chemical computational details.

All calculations in this work were performed using Gaussian 09 program package [32]. Geometries were fully optimized in water solvent at the B3LYP/6-311 + G\*\* level [33] and characterized by frequency analysis at 433 K. The self-consistent reaction field (SCRf) method based on the universal solvation model SMD [34] was adopted to evaluate the effect of solvent. Dispersion corrections were computed with Grimme's D3(BJ) method in optimization [35]. The intrinsic reaction coordinate (IRC) path was traced to check the energy profiles connecting each transition state to two associated minima of the proposed mechanism [36].

As for the behaviour of reactant on the Au(111) face, Vienna Ab Initio Package (VASP) [37] is employed to reveal the reaction mechanism at molecular level. Vienna Ab Initio Package (VASP) within the generalized gradient approximation (GGA) using the PBE [38] formulation was adopted. We have chosen the projected augmented wave

(PAW) potentials [39] to describe the ionic cores and take valence electrons into account using a plane wave basis set with a kinetic energy cutoff of 400 eV. Partial occupancies of the Kohn–Sham orbitals were allowed using the Gaussian smearing method with a width of 0.05 eV. The on-site corrections (DFT+U) [40] have been applied to the 4f electron of Au atoms. The electronic energy is considered self-consistent when the energy change was smaller than  $10^{-5}$  eV. A geometry optimization is considered convergent when the force change was smaller than 0.02 eV/Å. Grimme’s DFT-D3 methodology [41] is used to describe the dispersion interaction. The free energy is calculated using the equation:

$$G = E + ZPE - TS$$

where  $G$ ,  $E$ ,  $ZPE$  and  $TS$  represent the free energy, total energy from DFT calculations, zero point energy and entropic contributions, respectively. The transition state search has been obtained by the nudged elastic band methods. All the key intermediates and transition states are determined by energy span model.

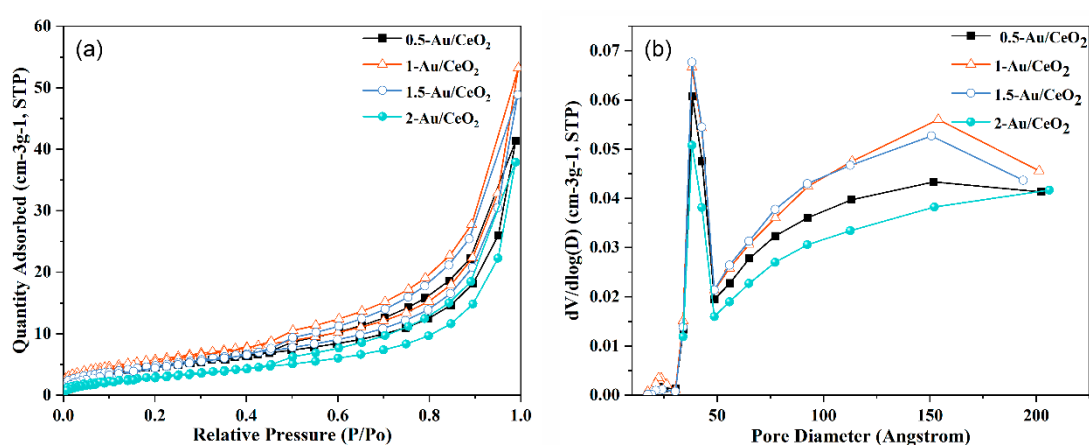

Figure S1. N<sub>2</sub> adsorption-desorption isotherm for the catalysts.

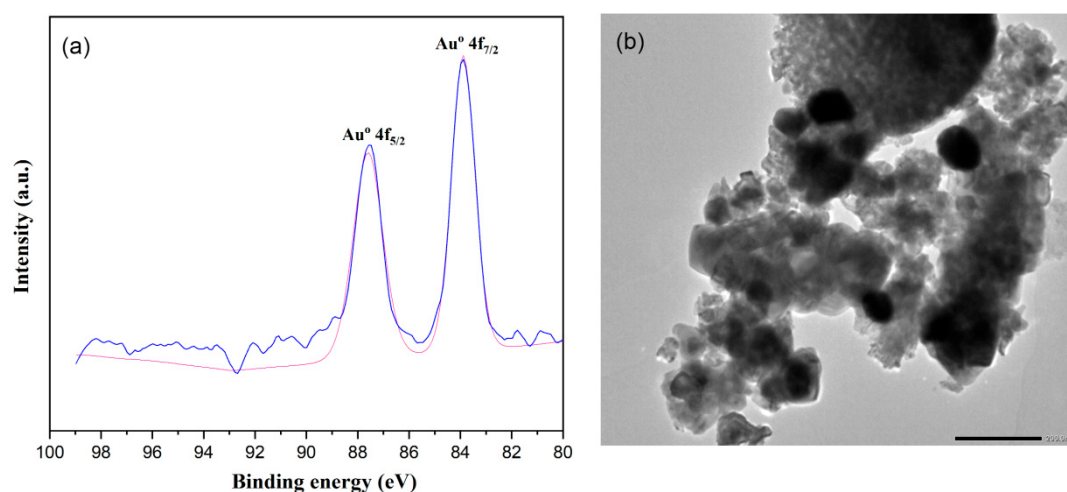

Figure S2. The characterizations of the spent Au/CeO<sub>2</sub> catalysts. (a) The XPS analysis of the prepared Au/CeO<sub>2</sub> catalyst. (b) The TEM image of Au/CeO<sub>2</sub> catalyst.

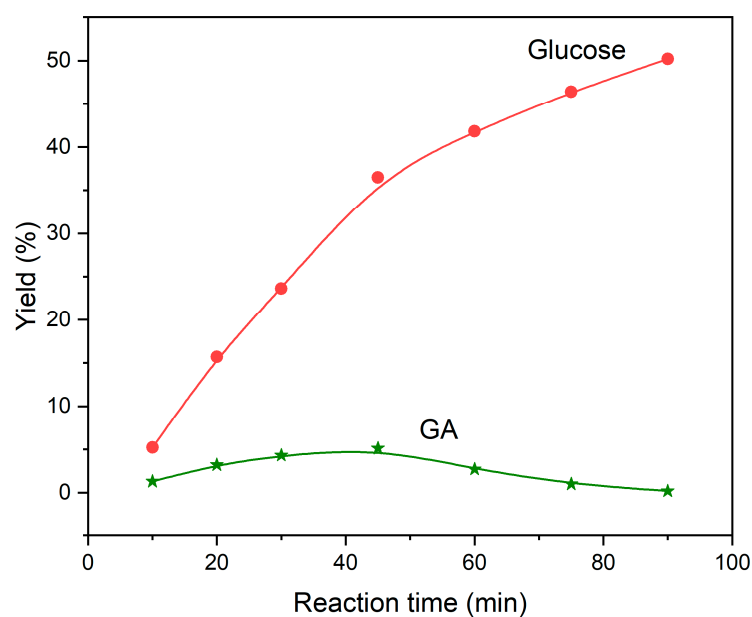

**Figure S3.** The time course of the glucose and GA formation during the conversion of corncob residue at 423 K.

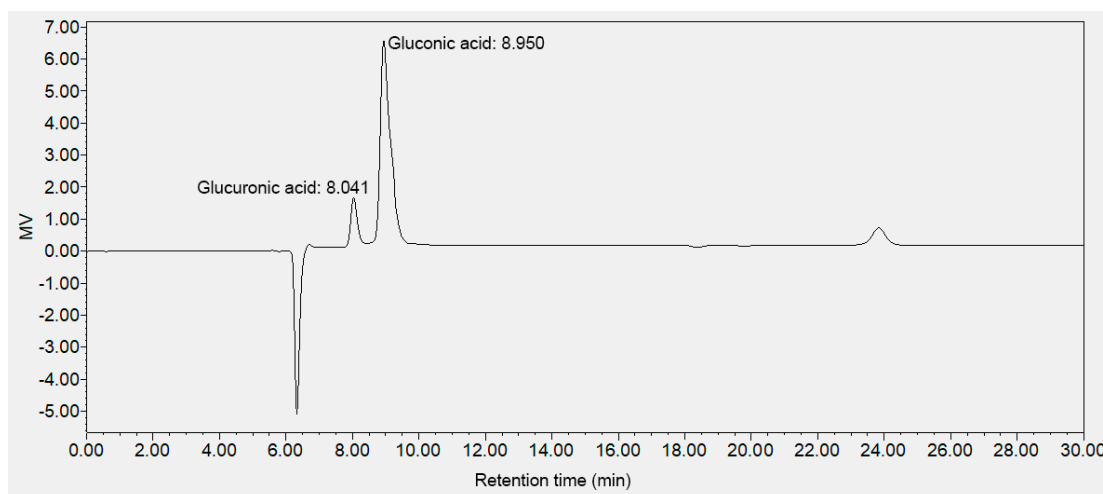

**Figure S4.** The HPLC analysis of the mixture of gluconic acid and glucuronic acid.

**Table S1.** Textural properties of the catalysts.

| Entry | Catalyst                    | $S^a$ (m <sup>2</sup> /g) | Pore Size <sup>b</sup> (nm) | Au Elemental Composition <sup>c</sup> (wt %) |
|-------|-----------------------------|---------------------------|-----------------------------|----------------------------------------------|
| 1     | 0.5 wt% Au/CeO <sub>2</sub> | 205.3                     | 26.6                        | 0.50                                         |
| 2     | 1 wt% Au/CeO <sub>2</sub>   | 201.1                     | 26.0                        | 0.99                                         |
| 3     | 1.5 wt% Au/CeO <sub>2</sub> | 197.9                     | 25.7                        | 1.47                                         |
| 4     | 2 wt% Au/CeO <sub>2</sub>   | 197.0                     | 25.4                        | 1.96                                         |

<sup>a</sup>Cu particle size of the catalysts was calculated using the Debye-Scherrer equation based on XRD analysis; <sup>b</sup>BET surface area (S), pore volume, and pore size were measured by N<sub>2</sub> adsorption-desorption; <sup>c</sup> Au elemental composition was calculated by ICP-AES analysis.

**Table S2.** The control experiments on the conversion of corncob residue to GA.<sup>a</sup>

|                     | Cellulose<br>Conversion<br>(%) | Yield of Products (%) |                  |             |               |               |
|---------------------|--------------------------------|-----------------------|------------------|-------------|---------------|---------------|
|                     |                                | GA                    | Glucaric<br>Acid | Formic Acid | Glycolic Acid | Glyceric Acid |
| Maleic acid         | 100                            | 3.5                   | 0.1              | 5.0         | 0.3           | 0.2           |
| Au/CeO <sub>2</sub> | 8                              | 1.1                   | -                | 0.7         | -             | -             |

<sup>a</sup>Reaction conditions: 1.0 g Corncob residue; 0.1 g Au/CeO<sub>2</sub> or 5 mM maleic acid; 50 mL H<sub>2</sub>O; O<sub>2</sub>, 1 MPa; temperature, 443 K; time, 2.0 h.

**Table S3.** The catalytic activity of different Au-based catalysts on the conversion of corncob residue to GA.<sup>a</sup>

|                                   | Cellulose<br>Conversion<br>(%) | Yield of Products (%) |                  |                |                  |                  |
|-----------------------------------|--------------------------------|-----------------------|------------------|----------------|------------------|------------------|
|                                   |                                | GA                    | Glucaric<br>Acid | Formic<br>Acid | Glycolic<br>Acid | Glyceric<br>Acid |
| Au/Al <sub>2</sub> O <sub>3</sub> | 88.1                           | 22.5                  | 0.1              | 5.1            | 1.9              | 0.9              |
| Au/ZrO <sub>2</sub>               | ~100                           | 56.7                  | 0.6              | 3.2            | 2.0              | 1.5              |
| Au/TiO <sub>2</sub>               | ~100                           | 59.1                  | 1.1              | 4.4            | 3.5              | 4.0              |

<sup>a</sup>Reaction conditions: 1.0 g Corncob residue; 0.2 g catalysts; 5 mM Maleic acid; 50 mL H<sub>2</sub>O; O<sub>2</sub>, 1 MPa; temperature, 443 K; time, 2.0 h.

**Table S4.** The effect of the amount of maleic acid on the conversion of corncob residue to GA.<sup>a</sup>

| The Amount<br>of Maleic Acid | Cellulose<br>Conversion<br>(%) | Yield of Products (%) |                  |             |                  |                  |
|------------------------------|--------------------------------|-----------------------|------------------|-------------|------------------|------------------|
|                              |                                | GA                    | Glucaric<br>Acid | Formic Acid | Glycolic<br>Acid | Glyceric<br>Acid |
| 4 mM                         | ~100                           | 50.2                  | 0.2              | 2.9         | 0.5              | 1.1              |
| 5 mM                         | ~100                           | 56.0                  | 0.3              | 3.4         | 0.6              | 1.3              |
| 6 mM                         | ~100                           | 58.8                  | 0.3              | 3.7         | 0.9              | 2.1              |
| 7 mM                         | ~100                           | 58.0                  | 0.3              | 4.2         | 1.7              | 3.0              |

<sup>a</sup>Reaction conditions: 1.0 g Corncob residue; 0.1 g Au/CeO<sub>2</sub>; 50 mL H<sub>2</sub>O; O<sub>2</sub>, 1 MPa; temperature, 443 K; time, 2.0 h.

**Table S5.** The effect of the amount of Au/CeO<sub>2</sub> on the conversion of corncob residue to GA.<sup>a</sup>

| The Amount<br>of Au/CeO <sub>2</sub> | Cellulose<br>Conversion<br>(%) | Yield of Products (%) |                  |             |                  |                  |
|--------------------------------------|--------------------------------|-----------------------|------------------|-------------|------------------|------------------|
|                                      |                                | GA                    | Glucaric<br>Acid | Formic Acid | Glycolic<br>Acid | Glyceric<br>Acid |
| 0.05 g                               | 95                             | 35.7                  | -                | 5.1         | 2.5              | 0.7              |
| 0.1 g                                | ~100                           | 58.8                  | 0.3              | 3.7         | 0.9              | 2.1              |
| 0.2 g                                | ~100                           | 60.1                  | 0.3              | 3.8         | 0.7              | 2.2              |
| 0.3 g                                | ~100                           | 58.0                  | 0.5              | 4.2         | 1.2              | 2.8              |

<sup>a</sup>Reaction conditions: 1.0 g Corncob residue; 6 mM maleic acid; 50 mL H<sub>2</sub>O; O<sub>2</sub>, 1 MPa; temperature, 443 K; time, 2.0 h.

**Table S6.** The effect of the amount of O<sub>2</sub> pressure on the conversion of corncob residue to GA.<sup>a</sup>

| O <sub>2</sub> Pressure | Cellulose<br>Conversion<br>(%) | Yield of Products (%) |                  |             |                  |                  |
|-------------------------|--------------------------------|-----------------------|------------------|-------------|------------------|------------------|
|                         |                                | GA                    | Glucaric<br>Acid | Formic Acid | Glycolic<br>Acid | Glyceric<br>Acid |
| 0.1 MPa                 | 67                             | 14.6                  | -                | 1.5         | 8.5              | 4.1              |
| 0.5 MPa                 | 89                             | 44.2                  | -                | 2.6         | 3.6              | 3.3              |
| 1.0 MPa                 | ~100                           | 60.3                  | 0.3              | 3.7         | 0.7              | 2.1              |
| 1.5 MPa                 | ~100                           | 57.7                  | 1.5              | 5.5         | 1.0              | 2.5              |

<sup>a</sup>Reaction conditions: 1.0 g Corncob residue; 0.2 g Au/CeO<sub>2</sub>; 6 mM maleic acid; 50 mL H<sub>2</sub>O; temperature, 443 K; time, 1.5 h.

**Table S7.** The effect of reaction temperature on the conversion of corncob residue to GA.<sup>a</sup>

| Reaction Temperature (K) | Cellulose Conversion (%) | Yield of Products (%) |               |             |               |               |
|--------------------------|--------------------------|-----------------------|---------------|-------------|---------------|---------------|
|                          |                          | GA                    | Glucaric Acid | Formic Acid | Glycolic Acid | Glyceric Acid |
| 423                      | 67                       | 50.2                  | 0.2           | 2.9         | 0.5           | 1.1           |
| 433                      | 89                       | 56.0                  | 0.3           | 3.4         | 0.6           | 1.3           |
| 443                      | ~100                     | 60.1                  | 0.3           | 3.8         | 0.7           | 2.2           |
| 453                      | ~100                     | 57.2                  | 0.3           | 4.5         | 1.5           | 2.0           |

<sup>a</sup>Reaction conditions: 1.0 g Corncob residue; 0.2 g Au/CeO<sub>2</sub>; 6 mM maleic acid; 50 mL H<sub>2</sub>O; O<sub>2</sub>, 1 MPa; time, 2.0 h.

**Table S8.** The effect of reaction time on the conversion of corncob residue to GA.<sup>a</sup>

| Reaction Time (h) | Cellulose Conversion (%) | Yield of Products (%) |               |             |               |               |
|-------------------|--------------------------|-----------------------|---------------|-------------|---------------|---------------|
|                   |                          | GA                    | Glucaric Acid | Formic Acid | Glycolic Acid | Glyceric Acid |
| 0.5               | 73                       | 32.1                  | 0.1           | 1.5         | 0.1           | 0.6           |
| 1                 | 92                       | 44.7                  | 0.2           | 2.4         | 0.3           | 0.9           |
| 1.5               | ~100                     | 60.3                  | 0.3           | 3.7         | 0.7           | 2.1           |
| 2                 | ~100                     | 60.1                  | 0.3           | 3.8         | 0.7           | 2.2           |

<sup>a</sup>Reaction conditions: 1.0 g Corncob residue; 0.2 g Au/CeO<sub>2</sub>; 6 mM maleic acid; 50 mL H<sub>2</sub>O; O<sub>2</sub>, 1 MPa; temperature, 443 K;.

**Table S9.** The control experiments on the conversion of cellulose to GA.<sup>a</sup>

| Cellulose Conversion (%) <sup>b</sup> |      |
|---------------------------------------|------|
| Maleic acid                           | ~100 |
| Au/CeO <sub>2</sub>                   | 14   |

<sup>a</sup>Reaction conditions: 1.0 g Corncob residue; 0.2 g Au/CeO<sub>2</sub> or 6 mM maleic acid if used; 50 mL H<sub>2</sub>O; O<sub>2</sub>, 1 MPa; temperature, 443 K; time, 1.5 h. <sup>b</sup>The conversion is based on the solid residue.

**Table S10.** The control experiments on the conversion of glucose to GA.<sup>a</sup>

|                     | Conversion (%) | Yield of Products (%) |               |             |               |               |
|---------------------|----------------|-----------------------|---------------|-------------|---------------|---------------|
|                     |                | GA                    | Glucaric Acid | Formic Acid | Glycolic Acid | Glyceric Acid |
| Maleic acid         | ~100           | 0.5                   | 6.7           | 10.2        | 2.7           | 3.5           |
| Au/CeO <sub>2</sub> | ~100           | 70.5                  | 0.7           | 2.1         | 3.9           | 1.5           |

<sup>a</sup>Reaction conditions: 1.0 g Corncob residue; 0.2 g Au/CeO<sub>2</sub>; 6 mM maleic acid; 50 mL H<sub>2</sub>O; O<sub>2</sub>, 1 MPa; temperature, 443 K; time, 1.5 h.

**Table S11.** The control experiments on the conversion of glucose to GA at different atmosphere.<sup>a</sup>

|                | Conversion (%) | Yield of Products (%) |                         |             |               |               |
|----------------|----------------|-----------------------|-------------------------|-------------|---------------|---------------|
|                |                | GA                    | 5-hydroxymethylfurfural | Formic Acid | Glycolic Acid | Glyceric Acid |
| N <sub>2</sub> | ~100           | 16.7                  | 18.0                    | 4.5         | 0.9           | 2.1           |

<sup>a</sup>Reaction conditions: 1.0 g Corncob residue; 0.2 g Au/CeO<sub>2</sub>; 6 mM maleic acid; 50 mL H<sub>2</sub>O; N<sub>2</sub>, 1 MPa; temperature, 443 K; time, 1.5 h.
